# Supplementary material for: Effect of Sugarcane Burning or Green Harvest Methods on the Brazilian Cerrado Soil Bacterial Community Structure
Source: PLoS One. 2013 Mar 22;8(3):e59342. doi: 10.1371/journal.pone.0059342 (PMC3606482; doi:10.1371/journal.pone.0059342)
Supplement: Table S1 — Average values of soil properties. (DOCX) [file pone.0059342.s003.docx]

**Table S1** –

| Parameters | Treatment | | |
| --- | --- | --- | --- |
| Control | Green cane | Burnt cane |
| pH | 6.6a | 6.4a | 5.8b |
| Exchangeable Al | BD | BD | BD |
| Exchangeable Ca | 11.4a | 10.b | 4.3c |
| Exchangeable Mg | 3.9a | 2.1b | 1.6c |
|  |  |  |  |
| Exchangeable Na | 1.7a | 2.8a | BD |
| Exchangeable K | 306.6b | 735.6a | 280.0b |
|  |  |  |  |
| Exchangeable H+Al | 4.8b | 5.0b | 6.5a |
| Total P | 102.3a | 34.6ab | 32.6b |
| SB1 | 16.1a | 14.2b | 6.6c |
| CEC2 | 20.9a | 19.0b | 13.1c |
| V3 | 77.0a | 74.7a | 50.4b |
| Total C | 12.5a | 6.7b | 15.9a |
| Total N | 0.70a | 0.30b | 0.90a |
|  |  |  |  |
| C:N | 17.9b | 22.3a | 16.4b |

The numbers represent average values (n=3). Averages followed by the same letter in each line are not statistically different (5%) from each other according to the Kolmogorov-Smirnov test for Ca, Mg, Na, K, P and V; and according Tukey test for the rest. BD - Below the detection limit of the technique. 1Sum of bases (sums of the Ca, Mg, Na and K content in cmolc dm-3). 2Cation exchange capacity (sums of SB and H+Al). 3Percent base saturation (SB divided by CEC). Parameters units: Al, Ca, Mg, H+Al, P, SB, CEC (cmolc dm-3), Na, K (mg dm-3), V (%).
